# Supplementary material for: Understanding the solubilization of Ca acetylide with a new computational model for ionic pairs
Source: Royal Society of Chemistry journal article supplement (doi:10.1039/d0sc04752j), 2020-01-01
Supplement: d0sc04752j3.pdf [file d0sc04752j3.pdf]

*Supporting Information for the Article*

# Understanding Solubilization of Ca Acetylide with a New Computational Model for Ionic Pairs

*Mikhail V. Polynski\*<sup>†‡</sup>, Mariia D. Sapova,<sup>†</sup> Valentine P. Ananikov\*<sup>†‡</sup>*

<sup>†</sup> Saint Petersburg State University, Universitetsky Prospekt 26, Saint Petersburg 198504,  
Russia.

<sup>‡</sup> Zelinsky Institute of Organic Chemistry, Russian Academy of Sciences, Leninsky Prospekt 47,  
Moscow 119991, Russia.

## AUTHOR INFORMATION

\* [polynskimikhail@gmail.com](mailto:polynskimikhail@gmail.com) (M.V.P.); [val@ioc.ac.ru](mailto:val@ioc.ac.ru) (V.P.A.).

## Table of Contents

|                                                                                                            |           |
|------------------------------------------------------------------------------------------------------------|-----------|
| <b>1. Computational Details .....</b>                                                                      | <b>3</b>  |
| 1.1. Solid State and Gas-phase $\text{CaC}_2$ .....                                                        | 3         |
| 1.2. $\Delta G_{\text{solv}}$ Computations with CSMs .....                                                 | 4         |
| 1.3. Coarse $\text{pK}_a$ Computations.....                                                                | 5         |
| 1.4. $\text{Ca}^{2+}$ Hydration .....                                                                      | 5         |
| 1.5. Mechanisms of $\text{C}\equiv\text{C}^{2-}$ and $^-\text{C}\equiv\text{CH}$ Protonation by DMSO ..... | 6         |
| 1.6. DFTB Modeling of DMSO Solutions .....                                                                 | 7         |
| <b>2. Modeling <math>\text{CaC}_2</math> Polymorphs and Clusters .....</b>                                 | <b>9</b>  |
| 2.1. Relative Stability of $\text{CaC}_2$ Polymorphs.....                                                  | 9         |
| 2.2. Unfavorable Sublimation of $\text{CaC}_{2(\text{s})}$ to $(\text{CaC}_2)_n$ Clusters.....             | 10        |
| <b>3. <math>\text{CaC}_2</math> Ionic Pair in Implicit (Continuum) Solvent.....</b>                        | <b>12</b> |
| <b>4. Comparing SMD results at different levels of theory.....</b>                                         | <b>13</b> |
| <b>5. Details of the MD runs .....</b>                                                                     | <b>14</b> |
| 5.1. Equilibrating the $[\text{Ca}^{2+}][\text{C}_2^{2-}]/\text{DMSO}$ system .....                        | 15        |
| 5.2. Equilibrating the $\text{HC}\equiv\text{C}-\text{Ca}-\text{OH}/\text{DMSO}$ system .....              | 17        |
| 5.3. Simulated annealing of the $[\text{Ca}^{2+}][\text{C}_2^{2-}]/\text{DMSO}$ system .....               | 19        |
| 5.4. Sampling the $\text{HC}\equiv\text{C}-\text{Ca}-\text{OH}/\text{DMSO}$ system .....                   | 21        |
| <b>6. References .....</b>                                                                                 | <b>23</b> |

## 1. Computational Details

A notice should be given on calculations  $\Delta G$  of reactions involving charged species in the gas phase. In this case, one needs to calculate molar Gibbs energies of naked cations or anions, which is only a hypothetical state of matter. It was suggested to use the formulae for the ideal gas as, for example, the Sackur-Tetrode equation.<sup>1,2</sup> Indeed,  $\Delta G$  computations treating charged gas-phase species as the ideal gas are ubiquitous and offer well acceptable accuracy, compared to experiment.<sup>3–6</sup> Therefore, we used the IG approximation for gas-phase cations and anions in this work, while being inherently dissatisfied with such an approach.

Except for the computations described in Section S1.1, we run all calculations on a simple workstation PC with an Intel Core i7-9700K CPU overclocked to 5 GHz (gaming-grade CPU), 48 Gb of RAM, and an entry-level MSI GeForce GTX 1050 Ti GPU (latter was used for the computations in the DFTB+ program). Notably, two runs were performed most of the time simultaneously (on CPU and on GPU).

### 1.1. Solid State and Gas-phase $\text{CaC}_2$

All solid-state density functional theory (DFT) calculations were performed using the CRYSTAL17 software.<sup>7</sup> In CRYSTAL17, crystalline orbitals (CO) are approximated as a linear combination of Bloch sums of Gaussian type orbitals (GTOs). We used a triple-zeta valence basis set with polarization quality (pob-TZVP) optimized for solid-state calculations<sup>8</sup> in combination with the geometrical counterpoise correction (gCP).<sup>9,10</sup> We used the hybrid PBE0 functional<sup>11</sup> with Grimme's dispersion D3 correction, including three-body term and Becke-Johnson dumping function.<sup>12,13</sup>

Overlap thresholds for Coulomb and exchange integrals were tightened to  $10^{-8}$ ,  $10^{-8}$ ,  $10^{-8}$ ,  $10^{-8}$ , and  $10^{-16}$ . Integration over the Brillouin zone was performed on the Monkhorst–Pack grid with the shrinking factor 6 corresponding to the primitive tetragonal cell with inversely scaling to the cell constants. We performed full optimization of cell parameters and atomic displacements. For the self-consistent calculations (SCF) the tolerance on total energy change was set to  $10^{-10}$  Hartree.

Gas-phase  $\text{CaC}_2$  calculations were performed on the same level of theory as for the solid-state (PBE0-D3/pob-TZVP-gCP).

## 1.2. $\Delta G_{\text{solv}}$ Computations with CSMs

In all computations with CSMs applied,  $\Delta G_{\text{solv}}$  is the difference between single point (total) energies of gas-phase geometries with a CSM applied, and without.

SMD and C-PCM computations were performed in ORCA 4.1.2. Tight SCF convergence criteria were set in all computations (the keyword TightSCF). A dense integration grid used for Kohn-Sham energy computations (GRID6, NOFINALGRID). Fock matrices were recalculated in each Kohn-Sham SCF iteration. See a detailed description of SMD calculation parameters in the main text. C-PCM computations were performed at the PBE0/def2-TZVP level of theory.<sup>14</sup>

Conventional COSMO<sup>15</sup> computations were performed in the ORCA 3.0.3 package. In this case, we employed the BP86 functional<sup>16–18</sup> and TZVP basis set<sup>19</sup> (the recommended choice for COSMO-RS calculations).<sup>20</sup> As long as the Resolution-of-the-Identity approximation (RI)<sup>21–27</sup> was used, the auxiliary basis set TZVP/J<sup>25</sup> was employed.

Additional computations were performed using the NWChem 7.0.0 package<sup>28</sup> within the restricted Kohn-Sham formalism to investigate how the choice of the underlying level of theory affects solvation free energies computed with SMD. The 6-31+G\*\* basis set<sup>29</sup> from the NWChem



library was used. The M05-2X, M06-2X, and PBE0 were used to estimate  $\Delta G_{\text{solv}}$  as the difference between single point (total) energies of gas-phase geometries with SMD applied, and without. The results are given in Section

### 1.3. Coarse $pK_a$ Computations

We chose PBE0 functional and the diffuse ma-def2-TZVP basis set<sup>30</sup> for calculations of  $pK_a$  since deprotonated anions were modeled. The RI approximation was not used in this case. The convergence strategy “VerySlowConv” and tight convergence criteria (TightSCF) were used in the KS-SCF procedure. Fock matrices were recalculated in every KS-SCF iteration. A dense integration grid was used (GRID6, NOFINALGRID). Vibrational frequencies were computed numerically. The otherm program<sup>31</sup> provided by the Duarte research group was used for the free energy computations. Free Gibbs energies were calculated within the ideal gas-quantum rotor-harmonic oscillator model (IG-QRRHO)<sup>32</sup> at  $T = 298.15$  K and  $P = 1$  atm;  $\Delta G_{\text{solv}}$  were computed with SMD (see the previous Subsection).

### 1.4. $\text{Ca}^{2+}$ Hydration

Since we were unable to model systems with  $\text{Ca}^{2+}$  cations in the periodic CRYSTAL17 program, we had to use the ORCA program at the level of theory closely resembling that one used for the computations in CRYSTAL17. PBE0 functional was selected in conjunction with the def2-TZVP basis set.<sup>14</sup> The RI approximation was used for both Coulomb and exchange terms;<sup>33,34</sup> accordingly, the def2/JK basis set<sup>35</sup> was employed. The gCP empirical correction for the BSSE was used.<sup>9</sup> Also, we used D3-correction for dispersion interactions with the Becke-Johnson damping function, and three-body terms included.<sup>12,13</sup> The TightSCF, GRID6, and

NOFINALGRID options were set. Vibrational frequencies were computed numerically. Fock matrices were recalculated each 8-th KS-SCF iteration. See the “Ca<sup>2+</sup> and HCC-Ca-OH” tab of the supporting .xlsx table for the formulae used in the calculation of the Ca<sup>2+</sup> Gibbs free energy.

### 1.5. Mechanisms of C<sup>≡</sup>C<sup>2-</sup> and <sup>-</sup>C<sup>≡</sup>CH Protonation by DMSO

This Subsection is relevant to the “Barriers” tab of the supporting .xlsx table. For a rough estimation of free energy barriers of the protonation within the Born-Oppenheimer approximation, we selected the B97-3c method.<sup>36</sup> It is a combination of a re-parameterized B97<sup>37</sup> functional and empirical corrections.<sup>12</sup> In B97-3c, a specially optimized triple- $\zeta$  basis set is used. We performed the B97-3c computations within the RI approximation and used the default auxiliary basis set (def2-mTZVP/J).

To find the transition states of the proton transfer, first, relaxed potential surface scans were performed in which H<sup>+</sup> migrated from the donor to acceptor atoms. Second, the highest energy structures from the scans were used for geometry optimization to transition states. All transition state structures exhibited a single imaginary mode corresponding to the proton vibration along the donor-acceptor line. The structures are included in the supporting PDF file in the XYZ format. Each .xyz file contains the value of the imaginary mode within it as a commentary line.

The bulk solvent effects we accounted for with SMD. The  $\Delta G_{solv}$  values were computed for the stationary points and transition states, as described in Section S1.2.

## 1.6. DFTB Modeling of DMSO Solutions

The integration of the equations of motion was done with the velocity Verlet algorithm and timestep of 0.5 fs. The Berendsen thermostat and barostat<sup>38</sup> were used in the equilibration MD runs. The Nosé-Hoover chain thermostat (chain length equal to 3)<sup>39</sup> was used for sampling runs and in the simulated annealing (SA). Except in the SA run, the target temperature of the thermostat was set to 300 K, while the external target pressure was set to  $10^5$  Pa. No constraints on cell vectors and angles were applied during the NPT runs. Initial velocities in the equilibration runs were set according to the Boltzmann distribution at 300 K. In the sampling runs, velocities from the last iteration of the equilibration runs were used as initial.

During the equilibration runs, the coupling strength of the Berendsen thermostat, as well as that of the barostat, was controlled by setting the timescale parameter as equal to 100 fs. Simulated annealing was performed at the cell volume relaxed in the equilibration run ( $19.996 \times 19.996 \times 19.996$  Å,  $\alpha = \beta = \gamma = 90^\circ$ ). The temperature profile for the SA is described in the main text; the coupling strength of the Nosé-Hoover chain thermostat was set to 10 THz. In the sampling run, the coupling strength of the Nosé-Hoover chain thermostat was 1 THz, and the coupling strength of the barostat was 1000 fs.

The SCC convergence tolerance was equal to  $10^{-6}$  Hartree; modified Broyden's mixing scheme was used.<sup>40</sup> The parameter  $\alpha$  in the Ewald electrostatic summation was determined automatically by the DFTB+. The tolerance for the Ewald summation was  $10^{-8}$  Hartree. The MAGMA library (ver. 2.5.0)<sup>41–45</sup> was statically linked upon DFTB+ compilation to enable hybrid GPU-CPU computations. Orbital populations were assigned according to the Fermi function with the electronic temperature of 300 K; it should be noted that this low value of electronic temperature

led to integer populations in the insulating solution systems. Only  $\Gamma$  point was considered in electronic structure computations.

Hydrogen atom interactions were damped with the parameter  $\zeta$  equal to 4.05.<sup>46</sup> Dispersion interactions were accounted for by the inclusion of the empirical corrections.<sup>12,47</sup>

The models of  $\text{Ca}(\text{C}\equiv\text{C})$  and  $\text{HO-Ca-C}\equiv\text{CH}$  in DMSO were constructed in the following way. As a model structure of liquid DMSO, we took a box obtained via a classic MD simulation with the OPLS forcefield,<sup>48</sup> as provided at the “virtualchemistry.org” website.<sup>49</sup> We put the ionic pairs  $\text{Ca}(\text{C}\equiv\text{C})$  and  $\text{HO-Ca-C}\equiv\text{CH}$  (pre-optimized at the PBE0-D3/pob-TZVP-gCP level) in the centers of periodic vacuum cells ( $2 \times 2 \times 2$  nm each, one molecule per cell). The cells were filled with DMSO molecules using the `gmx solvate` utility of the GROMACS program package (ver. 2018.1)<sup>50</sup>; for this, van der Waals radii provided by Bondi<sup>51</sup> (for sp carbon only) and Batsanov (all other elements) were used.<sup>52</sup> The so-obtained cell with the first ionic pair,  $\text{Ca}(\text{C}\equiv\text{C})$ , contained 55 DMSO molecules. 54 DMSO molecules were included in the cell with the second ionic pair,  $\text{HO-Ca-C}\equiv\text{CH}$ .

In the partially hydrolyzed acetylide system, i.e., in  $\text{HO-Ca-C}\equiv\text{CH}$  in DMSO, we took equitemporal snapshots in the sampling run at the first MD step and then at exactly 2.5, 5.0, 7.5, and 10.0 ps. For the  $[\text{Ca}^{2+}][\text{C}_2^{2-}]$  in DMSO, we took three snapshots in the simulated annealing run after the system cooled down to 300 K at 12, 14, and 16 ps. Also, in the  $[\text{Ca}^{2+}][\text{C}_2^{2-}]$  system, we took two snapshots in the equilibration run after the thermodynamic parameters and the coordination number of  $\text{Ca}^{2+}$  equilibrated, at 7 and 9 ps.

## 2. Modeling CaC<sub>2</sub> Polymorphs and Clusters

### 2.1. Relative Stability of CaC<sub>2</sub> Polymorphs

According to previous research,<sup>53–58</sup> there are three co-existing phases of calcium carbide at room temperature: CaC<sub>2</sub>-I (*I4/mmm*); CaC<sub>2</sub>-II (*C2/c*); CaC<sub>2</sub>-III (*C2/m*). The proportion of three polymorphic forms depends on the reaction conditions.<sup>55</sup>

Tetragonal phase CaC<sub>2</sub>-I is prevalent at room temperature, but its thermodynamic stability remains uncertain as the previous theoretical works provide inconsistent results. CaC<sub>2</sub>-I is stable according to earlier reports.<sup>57,59,60</sup> However, Häussermann, et al. calculated phonon dispersion of the tetragonal calcium carbide; it demonstrated dynamical instability at the X point of the Brillouin zone.<sup>54</sup> The authors considered two monoclinic phases (CaC<sub>2</sub>-II, CaC<sub>2</sub>-III) to be stable, with CaC<sub>2</sub>-II being a low-temperature phase. In contrast, CaC<sub>2</sub>-III phase is metastable according to the experimental work by Knapp and Ruschewitz.<sup>55</sup>

Doll, Jansen, et al. performed an extensive computational search for CaC<sub>2</sub> polymorphs.<sup>58</sup> Several new structures were predicted. CaC<sub>2</sub>-I was found as particularly stable at standard pressure, as well as two of newly predicted polymorphs. Here we considered CaC<sub>2</sub>-I, CaC<sub>2</sub>-II, and CaC<sub>2</sub>-III since these three phases are often observed in experimental studies.

We performed phonon calculations for the three CaC<sub>2</sub> modifications using appropriate supercells to consider multiple points of the Brillouin zone. Our computations indicate the dynamical stability of CaC<sub>2</sub>-I (no imaginary frequencies at the X point was found) and CaC<sub>2</sub>-II phases, while CaC<sub>2</sub>-III has an imaginary frequency at  $\Gamma$  point. Relative electronic and Gibbs free energies of the phases are listed in Table S1. According to our calculations, CaC<sub>2</sub>-I is the most stable polymorph. CIF files enclosing the primitive cells are provided in the SI.

We found no imaginary frequencies in the optimized supercell of CaC<sub>2</sub>-I. Briefly, we used the Gaussian basis set pob-TZVP<sup>8</sup> instead of the plane-wave BS, the hybrid PBE0<sup>11</sup> functional instead of its pure GGA counterpart, and included corrections for BSSE<sup>9,10</sup> and dispersion interactions.<sup>12,13</sup> All computational parameters are given below.

Authors of Ref. <sup>54</sup> profoundly point out possible anharmonicity of phonon vibrations in CaC<sub>2</sub>. As long as low-frequency modes in CaC<sub>2</sub> may indeed have anharmonic nature, considering CaC<sub>2</sub> phonon modes in anharmonic approximation seems worthwhile in future studies, as well as assessing relative stability of CaC<sub>2</sub> polymorphs with more sophisticated computational methods.

Gibbs free energy of the solid CaC<sub>2</sub> was averaged according to the Boltzmann distribution. The values of the Boltzmann weights  $Q_i$  demonstrate the equilibrium fractions of the CaC<sub>2</sub> polymorphs (see Table S1). CaC<sub>2</sub>-I, as the most stable phase, is the most abundant in the equilibrium distribution.

Table S1. The relative electronic and Gibbs free energies of the CaC<sub>2</sub> polymorphs. Gibbs free energies and Boltzmann weights correspond to 300 K and 1 atm.

|                       | $\Delta E_{\text{el}}$ , kJ/mol | $\Delta G$ (300 K), kJ/mol | $Q_i$ (300 K) |
|-----------------------|---------------------------------|----------------------------|---------------|
| CaC <sub>2</sub> -I   | 0                               | 0                          | 0.89          |
| CaC <sub>2</sub> -II  | 3                               | 7                          | 0.11          |
| CaC <sub>2</sub> -III | 11                              | 14                         | 0 (is a TS)   |

## 2.2. Unfavorable Sublimation of CaC<sub>2(s)</sub> to (CaC<sub>2</sub>)<sub>n</sub> Clusters

We performed calculations of a set of (CaC<sub>2</sub>)<sub>n</sub> clusters with the number of formula units (n) ranging from 1 to 8 (see figures in the supporting .xlsx table). All obtained clusters are dynamically

stable (no imaginary frequencies were observed). XYZ files with the cluster structures are provided in the supporting PDF file.

The Gibbs free energy of the cluster formation from crystal are presented in Table S2. We averaged the Gibbs free energy of the solid  $\text{CaC}_2$  according to the Boltzmann distribution, as described above. Despite the energy of the cluster formation per formula unit decrease, the full energy increases significantly. Considering the fact that implicit solvation of molecules usually results in an exergonic effect of only 20-30 kcal/mol, we suggest crystal decomposition to the molecule  $\text{CaC}_2$  ( $n=1$ ) is by far the most favorable process.

Table S2. Free energies of degradation to clusters with a number of formula units  $z = 1-8$ .

| $z$ | Formula            | Name          | $\Delta G_{\text{clust}}$ , kJ/mol | $\Delta G_{\text{clust}}/n$ , kJ/mol |
|-----|--------------------|---------------|------------------------------------|--------------------------------------|
| 1   | $\text{CaC}_2$     | CaC2_mol1_z1  | 777                                | 777                                  |
| 2   | $(\text{CaC}_2)_2$ | CaC2_mol2_z2  | 994                                | 497                                  |
| 2   | $(\text{CaC}_2)_2$ | CaC2_mol3_z2  | 988                                | 494                                  |
| 2   | $(\text{CaC}_2)_2$ | CaC2_mol4_z2  | 945                                | 472                                  |
| 3   | $(\text{CaC}_2)_3$ | CaC2_mol5_z3  | 1228                               | 409                                  |
| 4   | $(\text{CaC}_2)_4$ | CaC2_mol6_z4  | 1604                               | 401                                  |
| 4   | $(\text{CaC}_2)_4$ | CaC2_mol7_z4  | 1498                               | 374                                  |
| 5   | $(\text{CaC}_2)_5$ | CaC2_mol8_z5  | 1774                               | 355                                  |
| 6   | $(\text{CaC}_2)_6$ | CaC2_mol9_z6  | 1675                               | 279                                  |
| 6   | $(\text{CaC}_2)_6$ | CaC2_mol10_z6 | 1615                               | 269                                  |
| 6   | $(\text{CaC}_2)_6$ | CaC2_mol11_z6 | 2046                               | 341                                  |
| 8   | $(\text{CaC}_2)_8$ | CaC2_mol12_z8 | 1981                               | 248                                  |

### 3. CaC<sub>2</sub> Ionic Pair in Implicit (Continuum) Solvent

An overly simplified way is to model the solvation or hydrolysis of CaC<sub>2(s.)</sub> with a continuum solvation model (CSM). We calculated  $\Delta G_{solv}$  of the acetylide species HC≡C-Ca-OH in DMSO with three CSMs, namely, COSMO,<sup>15</sup> C-PCM,<sup>61</sup> and SMD<sup>62</sup> (see Table S3 and the supporting .xlsx table). It should be noted that neither of the used CSMs was initially parameterized for Ca systems. The more realistic approach, described in the main text, demonstrates that the exergonicity of the solvation of HC≡C-Ca-OH can be underestimated by CSMs by order of magnitude.

Table S3.  $\Delta G_{solv}$  of CaC<sub>2(g.)</sub> in DMSO according to conventional continuum solvation models.

| $[Ca^{2+}][C_2^{2-}]_{(g.)} \rightleftharpoons [Ca^{2+}][C_2^{2-}]_{(solv.)}$ |                              |
|-------------------------------------------------------------------------------|------------------------------|
| Method                                                                        | $\Delta G_{solv}$ , kcal/mol |
| SMD (M06-2X/6-31+G**)                                                         | -19.1                        |
| C-PCM (PBE0/ma-def2-TZVP)                                                     | -25.2                        |
| COSMO (RI-BP86/TZVP)                                                          | -30.5                        |



#### 4. Comparing SMD results at different levels of theory

We checked, if  $\Delta G_{solv}$  computed with SMD at the M06-2X/6-31+G\*\* and PBE0/6-31+G\*\* levels functionals are close to the results obtained at the M05-2X/6-31+G\*\*, which was used in the original parameterization.  $\Delta G_{solv}$  were calculated as the difference in total energies with and without SMD applied; gas-phase geometries optimized at the PBE0-D3(BJ)/pob-TZVP-gCP level were used for single point energy evaluations. Evidently, using SMD at the M06-2X/6-31+G\*\* level leads to a small deviation of 0.7 kcal/mol on a small test set of related species. On the contrary, using PBE0/6-31+G\*\*  $\Delta G_{solv}$  estimations with SMD may lead to small but pronounced deviation of 1.7 kcal/mol, as shown in Table S4.

Table S4. Comparison of different DFT methods in SMD computations.

| Molecule                                                    | M05-2X <sup>a</sup> | M06-2X <sup>a</sup> | PBE0 <sup>a</sup> |
|-------------------------------------------------------------|---------------------|---------------------|-------------------|
| [(DMSO) <sub>4</sub> Ca(C $\equiv$ C)] ( <i>iso1</i> )      | -32.1               | -31.2               | -29.8             |
| [(DMSO) <sub>4</sub> Ca(C $\equiv$ CH)(OH)] ( <i>iso3</i> ) | -25.8               | -24.8               | -23.4             |
| DMSO                                                        | -10.1               | -9.7                | -9.4              |
| H <sub>2</sub> O                                            | -5.6                | -5.5                | -5.5              |
| RMSD <sup>b</sup>                                           | 0                   | 0.7                 | 1.7               |

<sup>a</sup> The 6-31+G\*\* basis set was used, see computational details in Section S1.2;

<sup>b</sup> Root-mean-square deviation, relative to the SMD at the original M05-2X/6-31+G\*\* level;

All values are in kcal/mol. Corresponding full electronic energies are given in the supporting .xlsx table.

## 5. Details of the MD runs

In this Section, plots of thermodynamic parameters ( $G$ ,  $T$ ,  $P$ ,  $V$ ) and radial distribution functions are given. Note, that for consistency with the definitions of the thermodynamic parameters in DFTB+, the following equation for  $G$  was used:

$$G = U + PV - TS_{\text{electronic}},$$

I.e., only electronic entropy was included.

### 5.1. Equilibrating the $[\text{Ca}^{2+}][\text{C}_2^{2-}]/\text{DMSO}$ system

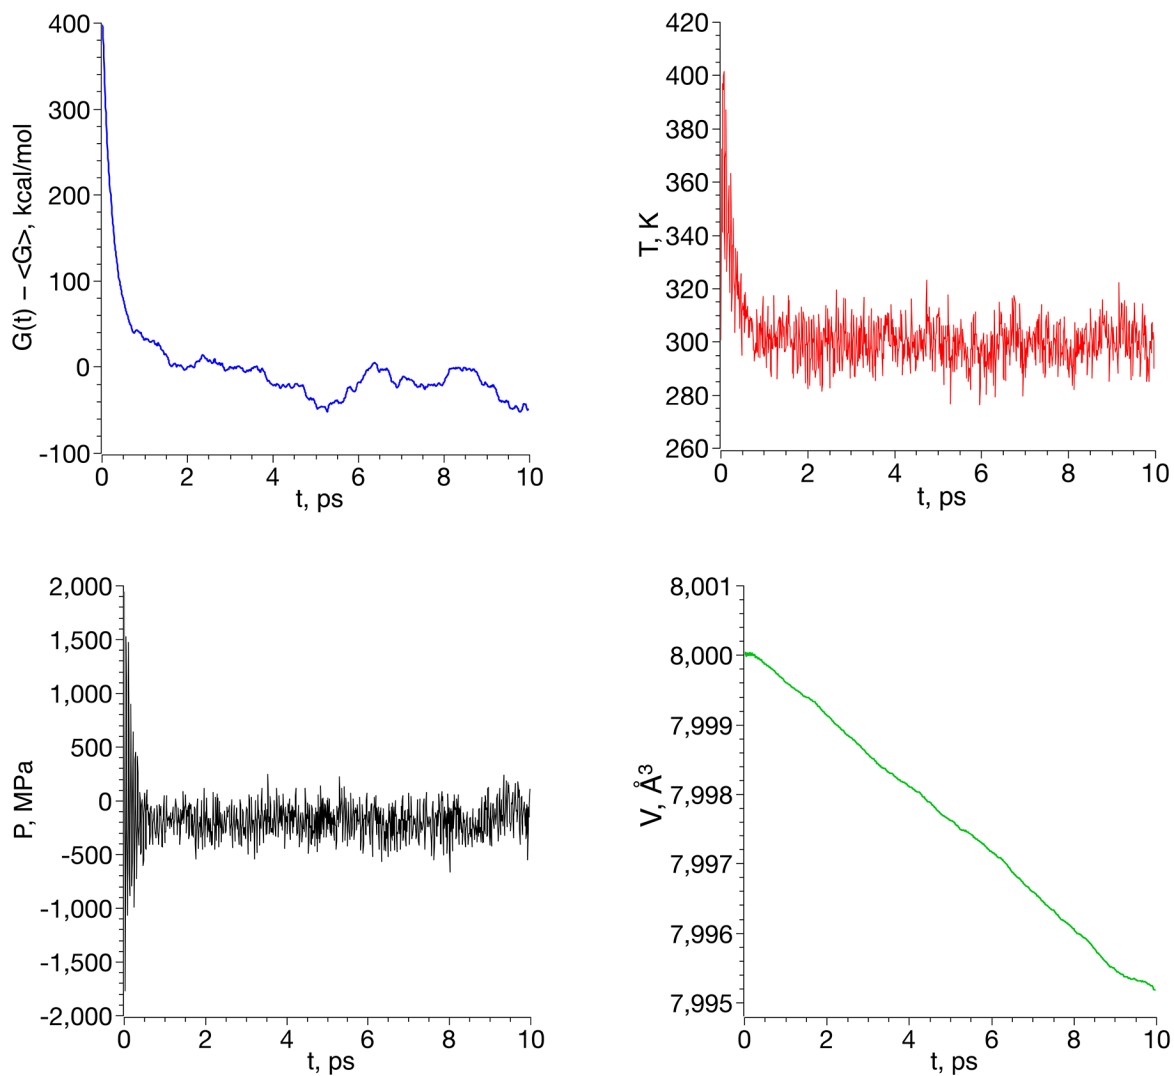

Figure S1. Thermodynamic parameters in the NPT simulation of  $[\text{Ca}^{2+}][\text{C}_2^{2-}]$  in DMSO. Berendsen thermostat and barostat were used.  $\langle G \rangle$  is the mean value calculated on the entire trajectory.

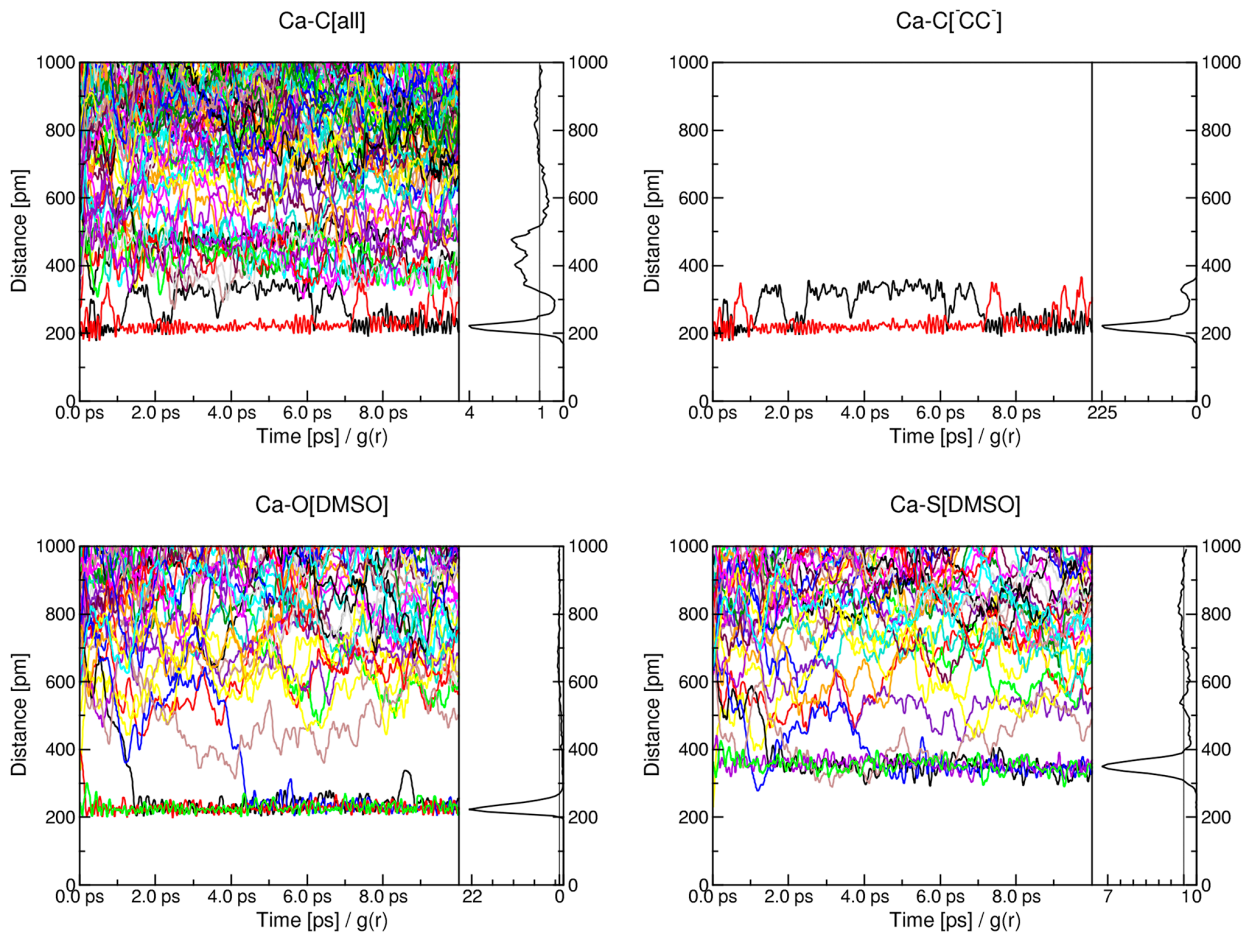

Figure S2. Radial distribution functions and evolution of selected interatomic distances in the equilibrating NPT simulation of  $[\text{Ca}^{2+}][\text{C}_2^{2-}]$  in DMSO. Berendsen thermostat and barostat were used.

## 5.2. Equilibrating the $\text{HC}\equiv\text{C-Ca-OH/DMSO}$ system

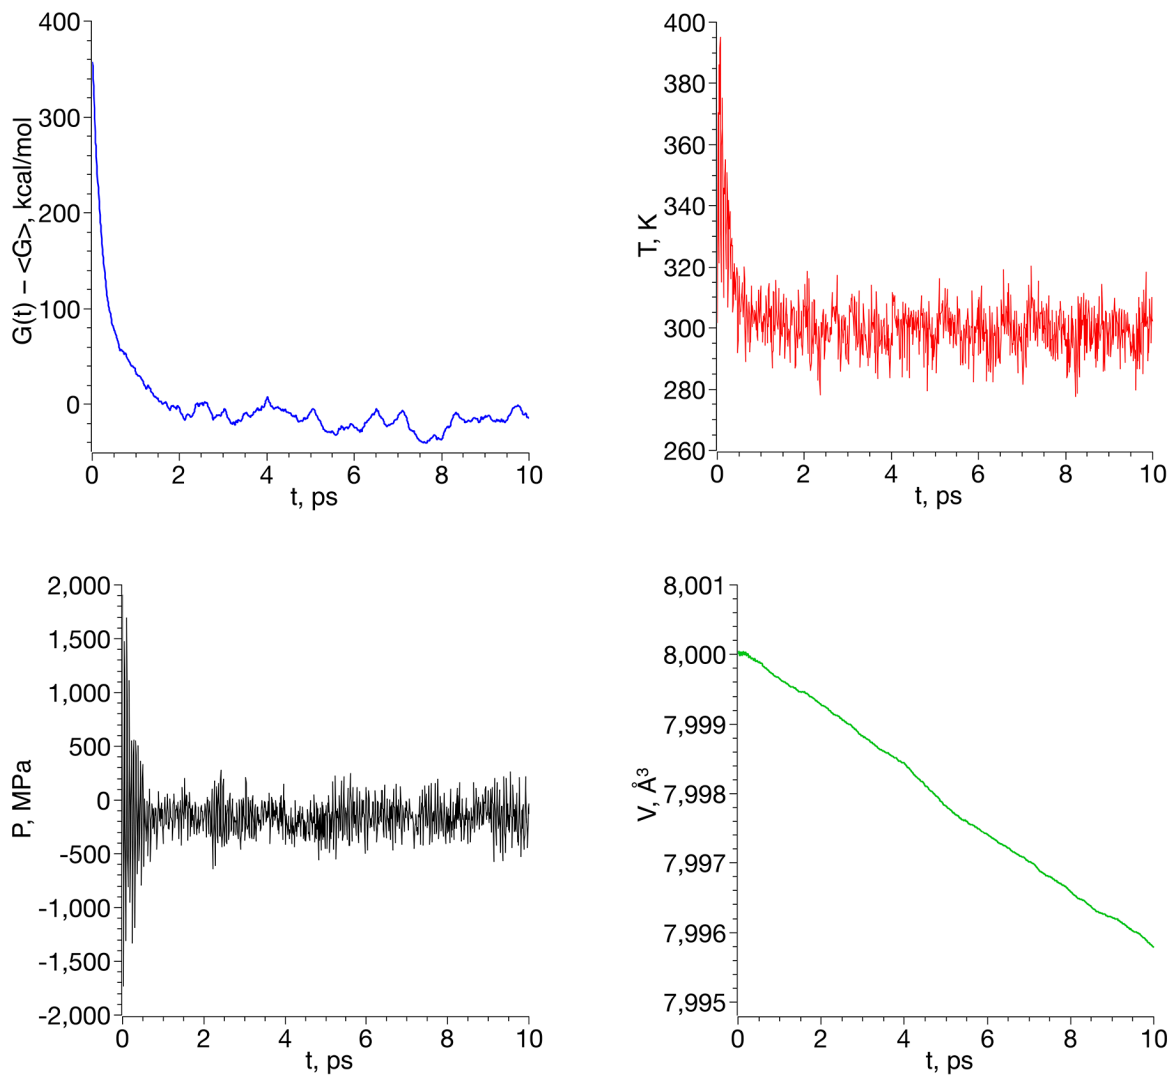

Figure S3. Thermodynamic parameters in the NPT simulation of  $\text{HC}\equiv\text{C-Ca-OH}$  in DMSO. Berendsen thermostat and barostat were used.  $\langle G \rangle$  is the mean value calculated on the entire trajectory.

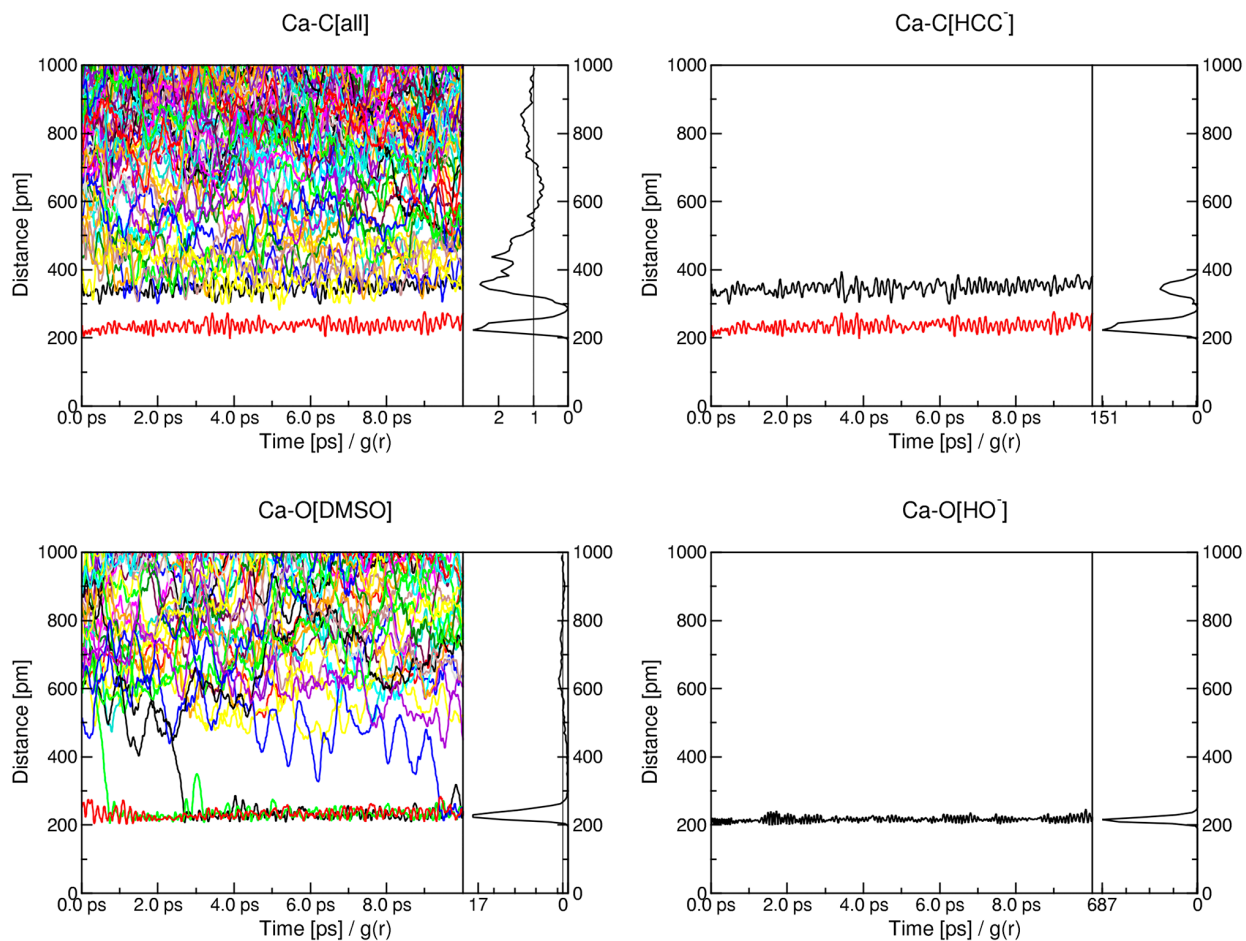

Figure S4. Radial distribution functions and evolution of selected interatomic distances in the equilibrating NPT simulation of  $\text{HC}\equiv\text{C-Ca-OH}$  in DMSO. Berendsen thermostat and barostat were used.

### 5.3. Simulated annealing of the $[\text{Ca}^{2+}][\text{C}_2^{2-}]/\text{DMSO}$ system

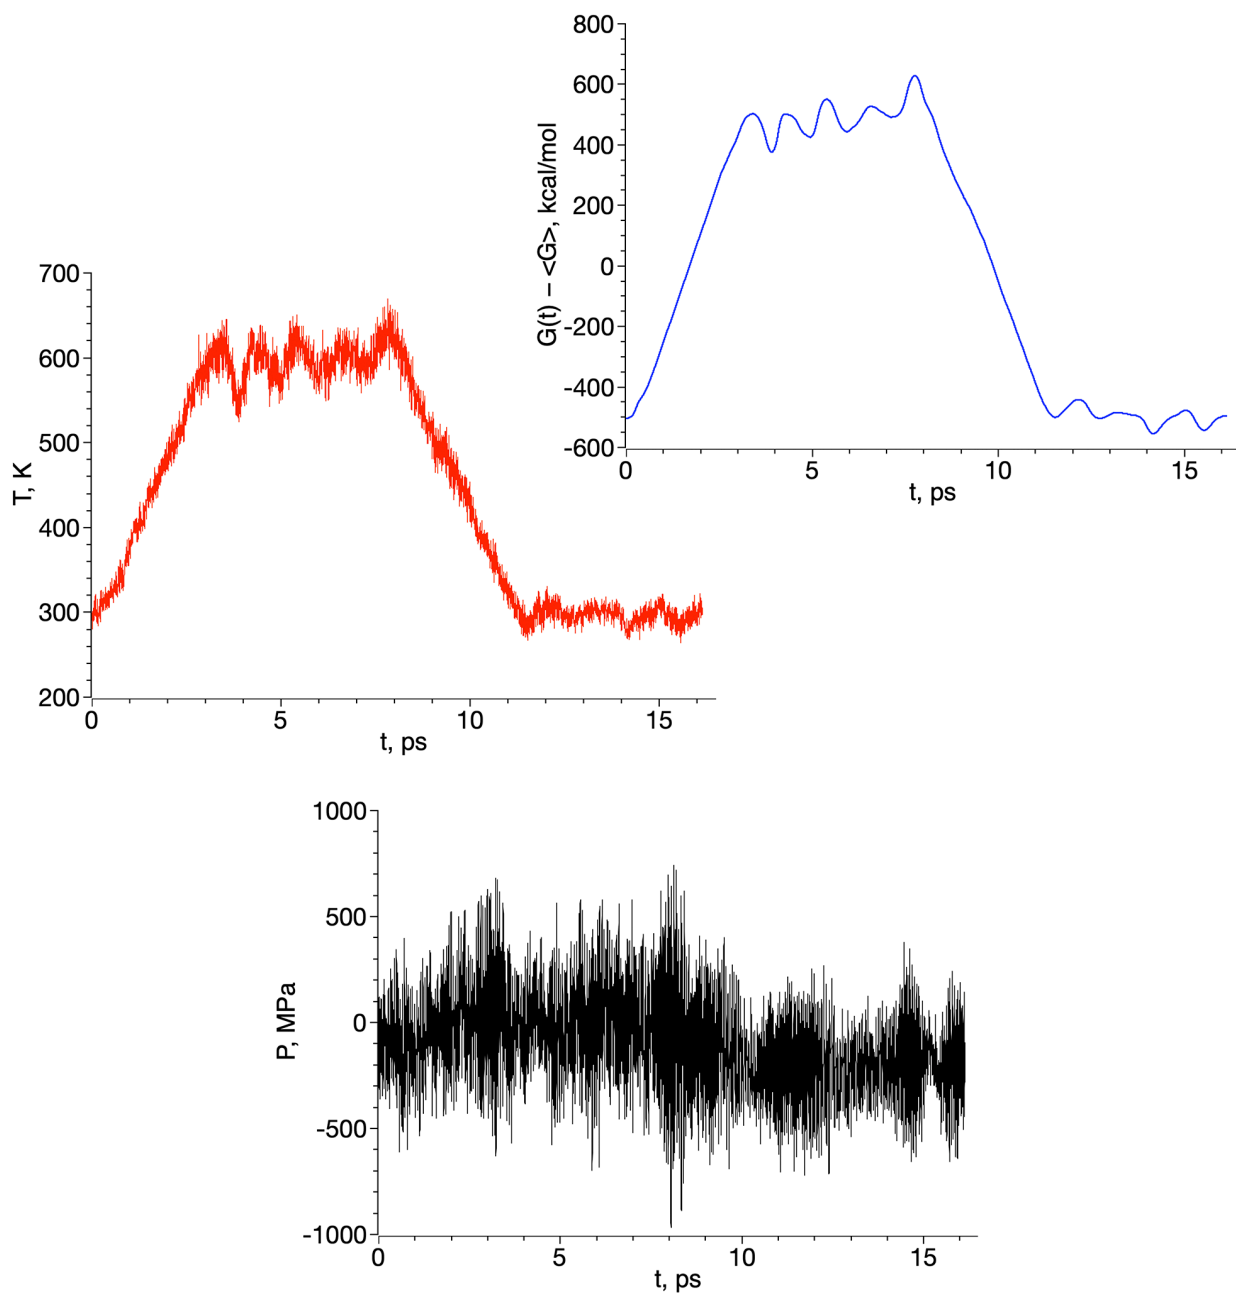

Figure S5. Thermodynamic parameters in the simulated annealing of  $[\text{Ca}^{2+}][\text{C}_2^{2-}]$  in DMSO under NVT conditions. Berendsen thermostat and barostat were used.  $\langle G \rangle$  is the mean value calculated on the entire trajectory.

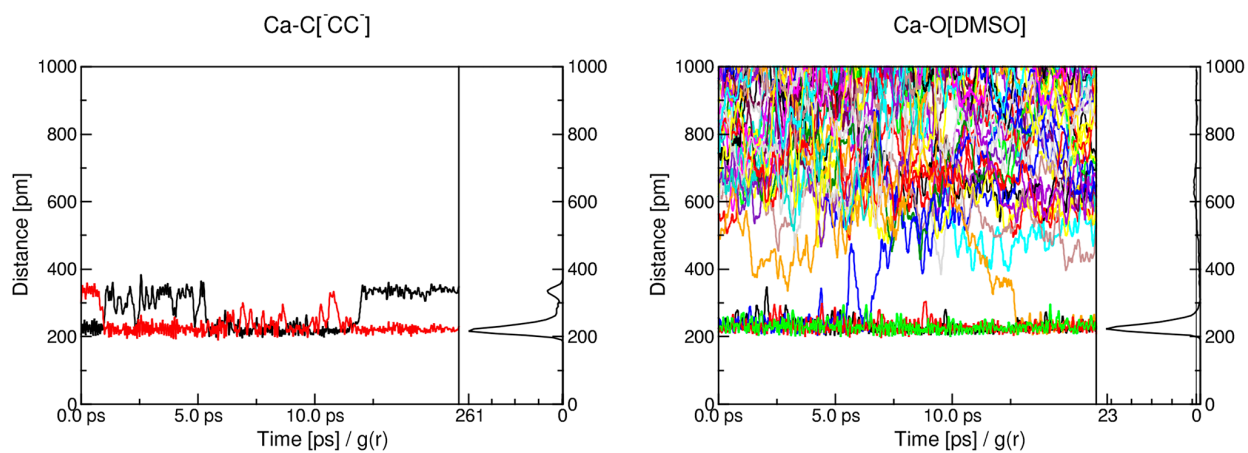

Figure S6. Radial distribution functions and evolution of selected interatomic distances in the simulated annealing of  $[\text{Ca}^{2+}][\text{C}_2^{2-}]$  in DMSO under NVT conditions. Berendsen thermostat and barostat were used.



#### 5.4. Sampling the $\text{HC}\equiv\text{C-Ca-OH/DMSO}$ system

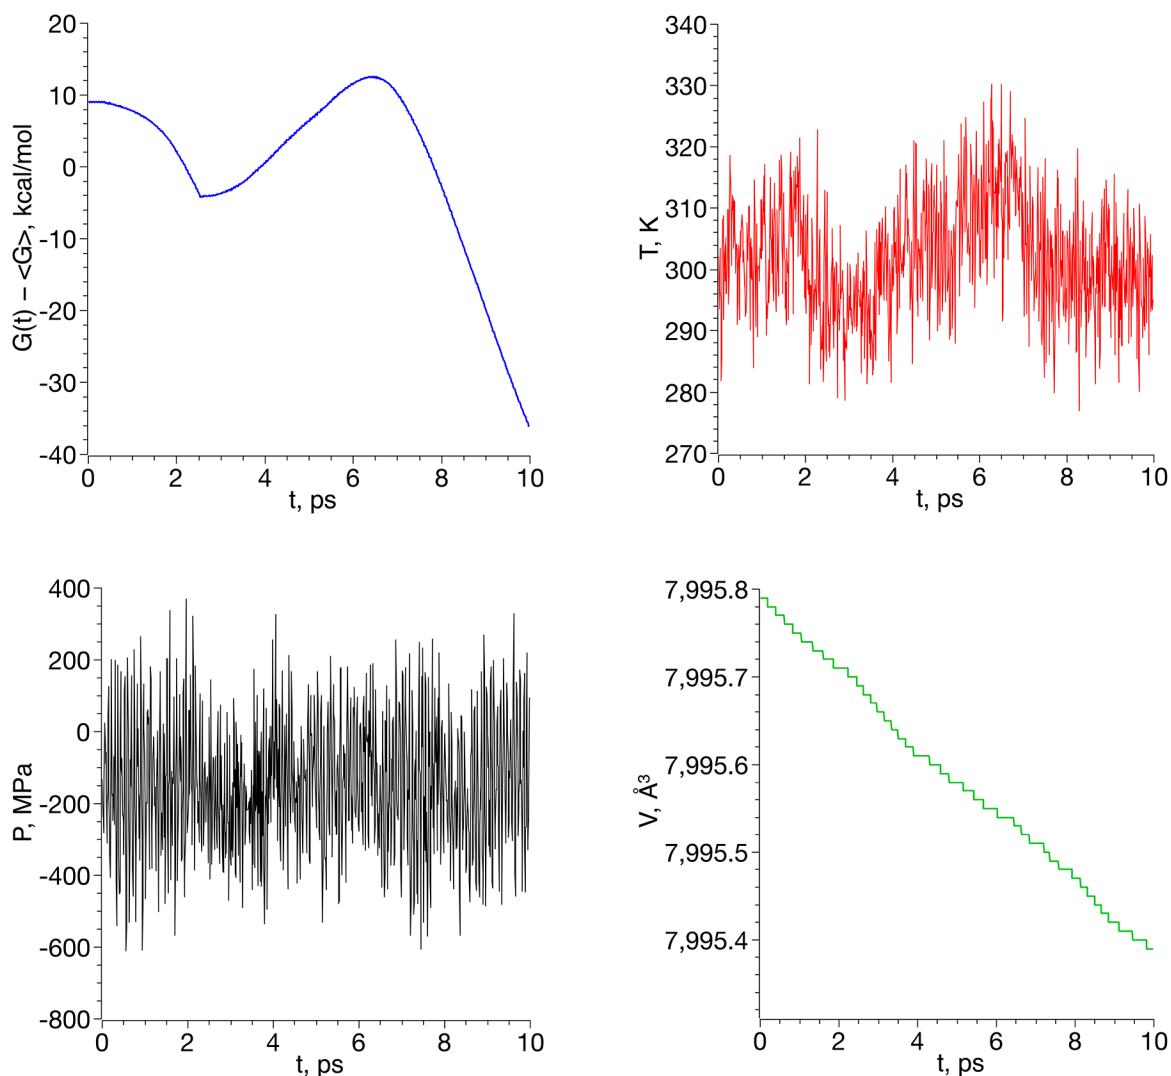

Figure S7. Thermodynamic parameters in the NPT simulation of  $\text{HC}\equiv\text{C-Ca-OH}$  in DMSO. Nosé-Hoover chain thermostat and Berendsen barostat were used.  $\langle G \rangle$  is the mean value calculated on the entire trajectory. Note the removable discontinuity in the  $G(t) - \langle G \rangle$  plot; this is the result of the forced simulation restart caused by a power outage. The simulation was restarted with the same atomic positions, velocities, and charges, but newly generated Nosé-Hoover chain variables.

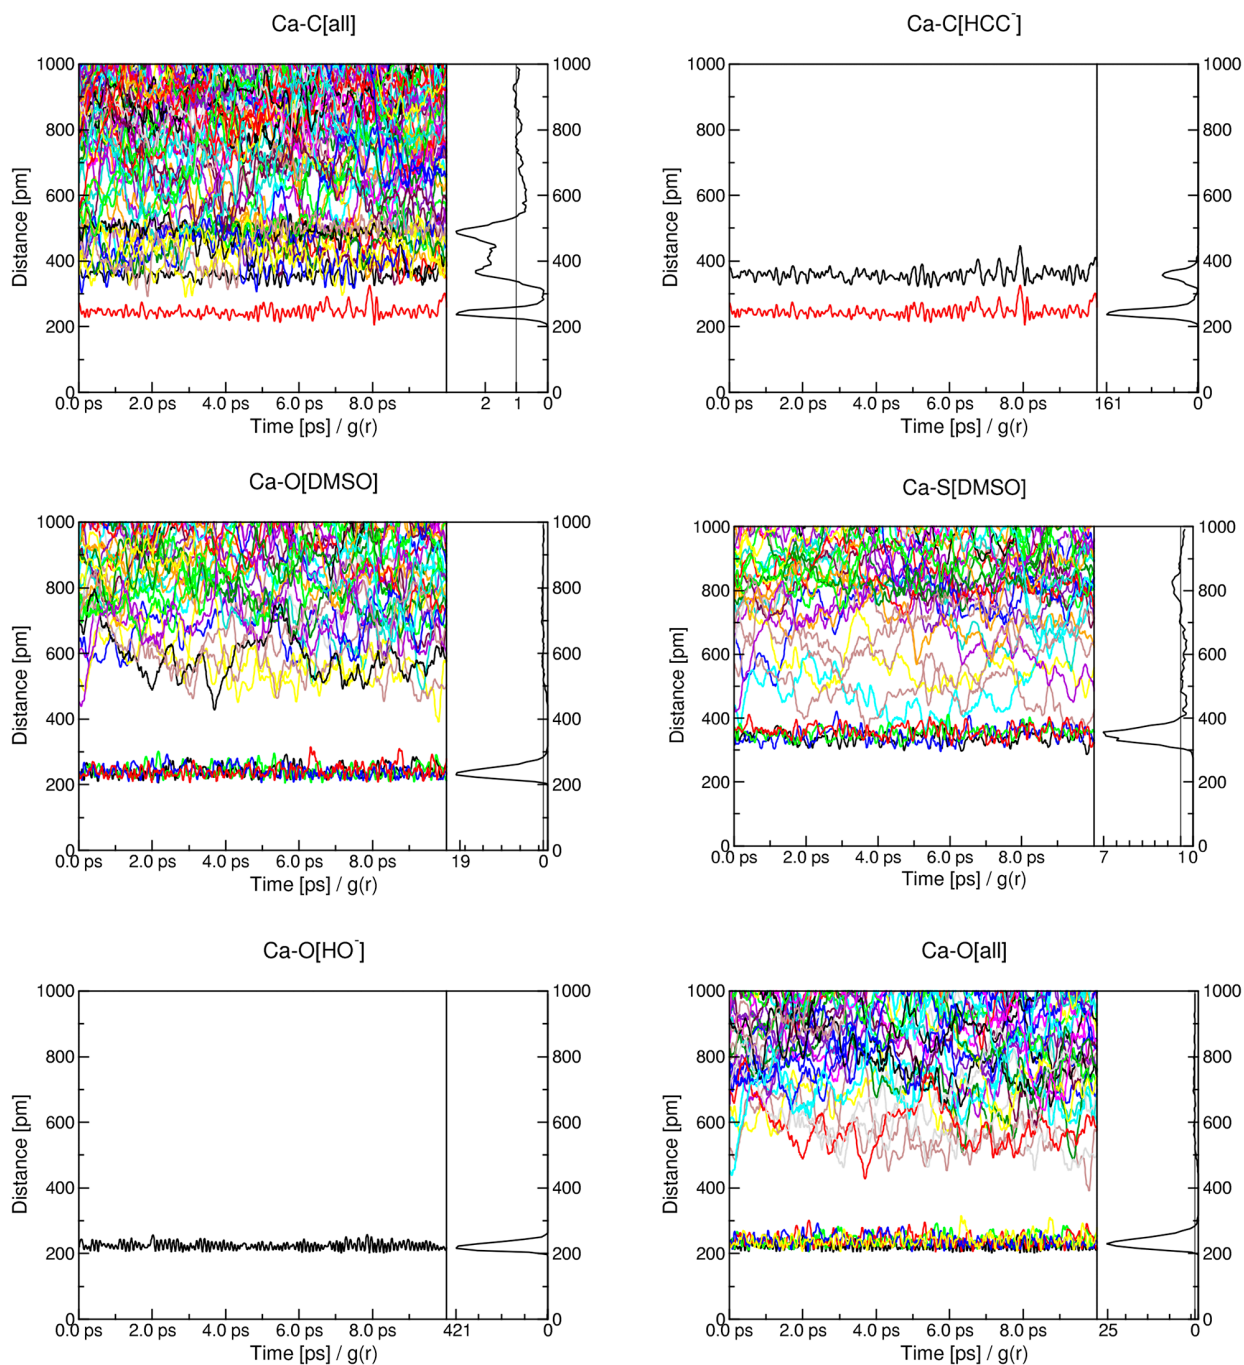

Figure S8. Radial distribution functions and evolution of selected interatomic distances in the sampling NPT simulation of  $\text{HC}\equiv\text{C-Ca-OH}$  in DMSO. Nosé-Hoover chain thermostat and Berendsen barostat were used.

## 6. References

- 1 C. P. Kelly, C. J. Cramer and D. G. Truhlar, *J. Phys. Chem. B*, 2007, **111**, 408–422.
- 2 A. Trummel, A. Rummel, E. Lippmaa, P. Burk and I. A. Koppel, *J. Phys. Chem. A*, 2009, **113**, 6206–6212.
- 3 J. R. Pliego and J. M. Riveros, *J. Phys. Chem. A*, 2001, **105**, 7241–7247.
- 4 Y. Takano and K. N. Houk, *J. Chem. Theory Comput.*, 2005, **1**, 70–77.
- 5 V. S. Bryantsev, M. S. Diallo and W. A. Goddard III, *J. Phys. Chem. B*, 2008, **112**, 9709–9719.
- 6 J. R. Pliego and J. M. Riveros, *Wiley Interdiscip. Rev. Comput. Mol. Sci.*, , DOI:10.1002/wcms.1440.
- 7 R. Dovesi, A. Erba, R. Orlando, C. M. Zicovich-Wilson, B. Civalleri, L. Maschio, M. Rérat, S. Casassa, J. Baima, S. Salustro and B. Kirtman, *Wiley Interdiscip. Rev. Comput. Mol. Sci.*, 2018, **8**, e1360.
- 8 M. F. Peintinger, D. V. Oliveira and T. Bredow, *J. Comput. Chem.*, 2013, **34**, 451–459.
- 9 H. Kruse and S. Grimme, *J. Chem. Phys.*, 2012, **136**, 154101.
- 10 J. G. Brandenburg, M. Alessio, B. Civalleri, M. F. Peintinger, T. Bredow and S. Grimme, *J. Phys. Chem. A*, 2013, **117**, 9282–9292.
- 11 C. Adamo and V. Barone, *J. Chem. Phys.*, 1999, **110**, 6158–6170.
- 12 S. Grimme, J. Antony, S. Ehrlich and H. Krieg, *J. Chem. Phys.*, 2010, **132**, 154104.

- 13 S. Grimme, S. Ehrlich and L. Goerigk, *J. Comput. Chem.*, 2011, **32**, 1456–1465.
- 14 F. Weigend and R. Ahlrichs, *Phys. Chem. Chem. Phys.*, 2005, **7**, 3297.
- 15 A. Klamt and G. Schüürmann, *J. Chem. Soc. Perkin Trans. 2*, 1993, 799–805.
- 16 S. H. Vosko, L. Wilk and M. Nusair, *Can. J. Phys.*, 1980, **58**, 1200–1211.
- 17 A. D. Becke, *Phys. Rev. A*, 1988, **38**, 3098–3100.
- 18 J. P. Perdew, *Phys. Rev. B*, 1986, **33**, 8822–8824.
- 19 A. Schäfer, H. Horn and R. Ahlrichs, *J. Chem. Phys.*, 1992, **97**, 2571–2577.
- 20 R. Franke and B. Hannebauer, *Phys. Chem. Chem. Phys.*, 2011, **13**, 21344–21350.
- 21 E. J. Baerends, D. E. Ellis and P. Ros, *Chem. Phys.*, 1973, **2**, 41–51.
- 22 B. I. Dunlap, J. W. D. Connolly and J. R. Sabin, *J. Chem. Phys.*, 1979, **71**, 3396.
- 23 C. Van Alsenoy, *J. Comput. Chem.*, 1988, **9**, 620–626.
- 24 R. A. Kendall and H. A. Früchtel, *Theor. Chim. Acta*, 1997, **97**, 158–163.
- 25 K. Eichkorn, F. Weigend, O. Treutler and R. Ahlrichs, *Theor. Chim. Acta*, 1997, **97**, 119–124.
- 26 K. Eichkorn, O. Treutler, H. Öhm, M. Häser and R. Ahlrichs, *Chem. Phys. Lett.*, 1995, **240**, 283–289.
- 27 J. L. Whitten, *J. Chem. Phys.*, 1973, **58**, 4496.
- 28 E. Aprà, E. J. Bylaska, W. A. de Jong, N. Govind, K. Kowalski, T. P. Straatsma, M. Valiev,

- H. J. J. van Dam, Y. Alexeev, J. Anchell, V. Anisimov, F. W. Aquino, R. Atta-Fynn, J. Autschbach, N. P. Bauman, J. C. Becca, D. E. Bernholdt, K. Bhaskaran-Nair, S. Bogatko, P. Borowski, J. Boschen, J. Brabec, A. Bruner, E. Cauët, Y. Chen, G. N. Chuev, C. J. Cramer, J. Daily, M. J. O. Deegan, T. H. Dunning, M. Dupuis, K. G. Dyall, G. I. Fann, S. A. Fischer, A. Fonari, H. Früchtl, L. Gagliardi, J. Garza, N. Gawande, S. Ghosh, K. Glaesemann, A. W. Götz, J. Hammond, V. Helms, E. D. Hermes, K. Hirao, S. Hirata, M. Jacquelin, L. Jensen, B. G. Johnson, H. Jónsson, R. A. Kendall, M. Klemm, R. Kobayashi, V. Konkov, S. Krishnamoorthy, M. Krishnan, Z. Lin, R. D. Lins, R. J. Littlefield, A. J. Logsdail, K. Lopata, W. Ma, A. V. Marenich, J. Martin Del Campo, D. Mejia-Rodriguez, J. E. Moore, J. M. Mullin, T. Nakajima, D. R. Nascimento, J. A. Nichols, P. J. Nichols, J. Nieplocha, A. Otero-de-la-Roza, B. Palmer, A. Panyala, T. Pirojsirikul, B. Peng, R. Peverati, J. Pittner, L. Pollack, R. M. Richard, P. Sadayappan, G. C. Schatz, W. A. Shelton, D. W. Silverstein, D. M. A. Smith, T. A. Soares, D. Song, M. Swart, H. L. Taylor, G. S. Thomas, V. Tipparaju, D. G. Truhlar, K. Tsemekhman, T. Van Voorhis, Vázquez-Mayagoitia, P. Verma, O. Villa, A. Vishnu, K. D. Vogiatzis, D. Wang, J. H. Weare, M. J. Williamson, T. L. Windus, K. Woliński, A. T. Wong, Q. Wu, C. Yang, Q. Yu, M. Zacharias, Z. Zhang, Y. Zhao and R. J. Harrison, *J. Chem. Phys.*, 2020, **152**, 184102.
- 29 M. M. Francel, W. J. Pietro, W. J. Hehre, J. S. Binkley, M. S. Gordon, D. J. DeFrees and J. A. Pople, *J. Chem. Phys.*, 1982, **77**, 3654–3665.
- 30 J. Zheng, X. Xu and D. G. Truhlar, *Theor. Chem. Acc.*, 2011, **128**, 295–305.
- 31 GitHub - duartegroup/otherm: thermochemical contributions from ORCA calculations, <https://github.com/duartegroup/otherm>, (accessed 24 December 2019).

- 32 S. Grimme, *Chem. - A Eur. J.*, 2012, **18**, 9955–9964.
- 33 H. A. Früchtl, R. A. Kendall, R. J. Harrison and K. G. Dyall, *Int. J. Quantum Chem.*, 1997, **64**, 63–69.
- 34 F. Weigend, *Phys. Chem. Chem. Phys.*, 2002, **4**, 4285–4291.
- 35 F. Weigend, *J. Comput. Chem.*, 2008, **29**, 167–175.
- 36 J. G. Brandenburg, C. Bannwarth, A. Hansen and S. Grimme, *J. Chem. Phys.*, 2018, **148**, 064104.
- 37 A. D. Becke, *J. Chem. Phys.*, 1998, **107**, 8554.
- 38 H. J. C. Berendsen, J. P. M. Postma, W. F. Van Gunsteren, A. Dinola and J. R. Haak, *J. Chem. Phys.*, 1984, **81**, 3684–3690.
- 39 G. J. Martyna, M. E. Tuckerman, D. J. Tobias and M. L. Klein, *Mol. Phys.*, 1996, **87**, 1117–1157.
- 40 D. D. Johnson, *Phys. Rev. B*, 1988, **38**, 12807–12813.
- 41 S. Tomov, J. Dongarra and M. Baboulin, *Parallel Comput.*, 2010, **36**, 232–240.
- 42 S. Tomov, R. Nath, H. Ltaief and J. Dongarra, in *Proc. of the IEEE IPDPS'10*, IEEE Computer Society, Atlanta, GA, 2010, pp. 1–8.
- 43 J. Dongarra, M. Gates, A. Haidar, J. Kurzak, P. Luszczek, S. Tomov and I. Yamazaki, *Numer. Comput. with GPUs*, 2014, 1–26.
- 44 R. Nath, S. Tomov and J. Dongarra, *Int. J. High Perform. Comput. Appl.*, 2010, **24**, 511–

515.

- 45 R. Nath, S. Tomov and J. Dongarra, in *Proceedings of the 2009 International Meeting on High Performance Computing for Computational Science, VECPAR'10*, Springer, Berkeley, CA, 2010.
- 46 M. Gaus, Q. Cui and M. Elstner, *J. Chem. Theory Comput.*, 2011, **7**, 931–948.
- 47 M. Kubillus, T. Kubař, M. Gaus, J. Řezáč and M. Elstner, *J. Chem. Theory Comput.*, 2015, **11**, 332–342.
- 48 C. Caleman, P. J. Van Maaren, M. Hong, J. S. Hub, L. T. Costa and D. Van Der Spoel, *J. Chem. Theory Comput.*, 2012, **8**, 61–74.
- 49 D. van der Spoel, P. J. van Maaren and C. Caleman, *Bioinformatics*, 2012, **28**, 752–753.
- 50 M. J. Abraham, T. Murtola, R. Schulz, S. Páll, J. C. Smith, B. Hess and E. Lindah, *SoftwareX*, 2015, **1–2**, 19–25.
- 51 A. Bondi, *J. Phys. Chem.*, 1964, **68**, 441–451.
- 52 S. S. Batsanov, *Inorg. Mater.*, 2001, **37**, 871–885.
- 53 M. A. Bredig, *J. Phys. Chem.*, 1942, **46**, 801–819.
- 54 S. Konar, J. Nylén, G. Svensson, D. Bernin, M. Edén, U. Ruschewitz and U. Häussermann, *J. Solid State Chem.*, 2016, **239**, 204–213.
- 55 M. Knapp and U. Ruschewitz, *Chem. - Eur. J.*, 2001, **7**, 874–880.
- 56 M. Atoji and R. C. Medrud, *J. Chem. Phys.*, 1959, **31**, 332–337.

- 57 M. Atoji, *J. Chem. Phys.*, 1971, **54**, 3514–3516.
- 58 A. Kulkarni, K. Doll, J. C. Schön and M. Jansen, *J. Phys. Chem. B*, 2010, **114**, 15573–15581.
- 59 E. Ruiz and P. Alemany, *J. Phys. Chem.*, 1995, **99**, 3114–3119.
- 60 J. R. Long, R. Hoffmann and H. J. Meyer, *Inorg. Chem.*, 1992, **31**, 1734–1740.
- 61 M. Cossi, N. Rega, G. Scalmani and V. Barone, *J. Comput. Chem.*, 2003, **24**, 669–681.
- 62 A. V. Marenich, C. J. Cramer and D. G. Truhlar, *J. Phys. Chem. B*, 2009, **113**, 6378–6396.
