# Supplementary material for: Understanding the solubilization of Ca acetylide with a new computational model for ionic pairs
Source: Chem Sci. 2020 Oct 8;11(48):13102–12. doi: 10.1039/d0sc04752j (PMC8163204; doi:10.1039/d0sc04752j)
Supplement: SC-011-D0SC04752J-s001 [file SC-011-D0SC04752J-s001.xlsx]

## Sheet: CaC2 polymorphs
									Vibrational frequencies
*CaC2_cif.zip	Space group	a, Å	b, Å	c, Å	β, ˚		CaC2-I (I4/mmm)
CaC2-I	I4/mmm (139)	3.79508	3.79508	6.33927	90			Gamma	M	X	P	N
CaC2-II	C2/c (15)	6.62161	4.03459	7.04051	103.519		1	0	157.707	55.3084	157.707	170.753
CaC2-III	C2/m (12)	7.1429	3.75059	7.23803	107.174		2	0	157.707	155.668	157.707	217.895
							3	0	233.444	169.884	233.444	246.696
	E_el (PBE0d3/pob-TZVP-gCP ), Hartree	G (300 K, PBE0d3/pob-TZVP-gCP ), Hartree	E_el/Nfu**, Hartree	G/Nfu** (300K)			4	275.237	276.081	217.846	276.081	273.732
CaC2-I (supercell x16)	-753.583	-753.577	-753.583	-753.577			5	275.237	276.081	300.798	276.081	278.273
CaC2-II (supercell x8)	-1507.16	-1507.15	-753.582	-753.575			6	354.187	311.248	358.319	311.248	311.513
CaC2-III (supercell x8)	-1507.16	-1507.14	-753.579	-753.572			7	371.102	388.099	376.866	388.099	378.49
				**Nfu - number of formula units			8	371.102	388.099	408.001	388.099	379.161
	ΔE_el, kJ/mol	ΔG (300 K), kJ/mol					9	2022.61	2023.14	2025.08	2023.14	2022.6
CaC2-I -> CaC2-II	3.24	5.20304
CaC2-I -> CaC2-III	11.3934	13.1692					CaC2-II (C2/c)
								Gamma	Y	A	M	V	L
							1	0	107.917	100.581	137.993	137.959	119.139
							2	0	137.937	100.581	137.993	150.856	154.293
							3	0	181.949	130.422	186.515	186.488	190.091
							4	168.549	214.365	130.422	186.515	197.074	190.831
							5	202.351	228.195	163.866	225.347	210.868	206.64
							6	236.277	249.7	163.866	225.347	223.732	224.233
							7	248.636	252.074	283.965	283.245	273.965	260.809
							8	271.741	272.072	283.965	283.245	283.734	275.275
							9	295.723	293.511	316.383	308.038	292.535	285.631
							10	319.012	316.946	316.383	308.038	308.26	317.537
							11	344.139	340.152	355.712	348.691	322.33	326.698
							12	348.14	355.434	355.712	348.691	327.574	342.743
							13	361.051	373.393	374.515	380.208	346.884	349.672
							14	378.413	376.386	374.515	380.208	368.128	365.233
							15	391.871	403.672	448.171	392.077	394.05	395.705
							16	416.065	411.382	448.171	392.077	400.799	408.906
							17	2023.51	2025.1	2024.42	2026	2025.56	2025.1
							18	2025.39	2026.84	2024.42	2026	2027.91	2028.34
							CaC2-III (C2/m)
								Gamma	Y	A	M	V	L
							1	-80.0906	-111.855	-118.192	-111.754	-177.094	-163.932
							2	0	118.391	107.684	149.298	136.789	107.215
							3	0	136.438	113.831	176.512	159.179	141.466
							4	0	194.543	138.005	192.016	184.867	212.613
							5	195.644	212.311	166.54	207.544	216.134	218.918
							6	234.764	230.75	170.077	211.525	239.26	249.86
							7	260.885	257.165	212.969	222.11	259.974	251.648
							8	263.828	281.283	279.989	286.095	286.031	263.856
							9	279.735	285.164	293.111	293.309	302.539	283.734
							10	287.144	296.946	306.209	313.56	310.12	322.029
							11	310.342	301.69	324.029	314.464	324.414	323.358
							12	349.944	309.519	351.266	322.82	329.877	332.778
							13	351.539	332.268	368.063	327.132	354.838	353.796
							14	376.162	367.506	381.384	340.12	356.293	363.005
							15	381.892	381.376	439.562	370.425	393.97	391.951
							16	405.444	383.785	448.564	382.751	394.724	406.578
							17	2021.71	2024.24	2021.2	2024.26	2022.42	2022.32
							18	2049.23	2051.28	2048.65	2051.08	2049.3	2049.4

## Sheet: CaC2 Clusters
	G_cryst/Nfu (300 K, PBE0/pob-TZVP)	G_cryst (300 K, PBE0/pob-TZVP), kJ/mol	Relative G	Boltzmann weight	G(CaC2), Hartree
CaC2-I (139)	-753.577	-1.97852e+06	0	0.890795	-753.577
CaC2-II (15)	-753.575	-1.97851e+06	5.20304	0.109205	-753.575
CaC2-III (12)	-753.572	-1.9785e+06	13.1692	0	-753.572
Z	Name*	G_vacuo(300 K, PBE0/pob-TZVP), Hartree	G_vacuo(300 K, PBE0/pob-TZVP), kJ/mol	ΔG_clust, kJ/mol	ΔG_clust/Z, kJ/mol
1	CaC2_mol1_z1	-753.281	-1.97774e+06	776.726	776.726
2	CaC2_mol2_z2	-1506.77	-3.95604e+06	994.162	497.081
2	CaC2_mol3_z2	-1506.78	-3.95604e+06	987.533	493.767
2	CaC2_mol4_z2	-1506.79	-3.95609e+06	944.998	472.499
3	CaC2_mol5_z3	-2260.26	-5.93432e+06	1227.6	409.2
4	CaC2_mol6_z4	-3013.7	-7.91246e+06	1603.99	400.998
4	CaC2_mol7_z4	-3013.74	-7.91256e+06	1497.94	374.486
5	CaC2_mol8_z5	-3767.21	-9.8908e+06	1774.32	354.865
6	CaC2_mol9_z6	-4520.82	-1.18694e+07	1675.34	279.224
6	CaC2_mol10_z6	-4520.85	-1.18695e+07	1614.6	269.1
6	CaC2_mol11_z6	-4520.68	-1.1869e+07	2046	340.999
8	CaC2_mol12_z8	-6027.86	-1.58261e+07	1980.68	247.585
	*see the supporting ZIP archive

## Sheet: CaC2 Solvation
Species	E_vacuo (M06-2X/6-31+G**)	E_SMD (M06-2X/6-31+G**)	∆Gsolv, Hartree	G_vacuo (300 K), Hartree	G_vacuo (300 K, PBE0/pob-TZVP), kJ/mol	Relative G (vacuo)	Boltzmann weight (vacuo)	Relative G (solv)	Boltzmann weight (solv)	G_full (vacuo+solv), Hartree	G_full (vacuo+solv), kJ/mol
Molecules
H2O				-76.3643	-200494
DMSO				-552.726	-1.45118e+06
H-CC-Ca-OH				-829.812	-2.17867e+06
CaC2				-753.281	-1.97774e+06
Molecule-solvent complexes
CaC2-iso1	-2966.1	-2966.14	-0.0430351	-2964.4	-7.78302e+06	19.8375	0.000243904	0	0.995288	-2964.44	-7.78314e+06
CaC2-iso2	-2966.09	-2966.12	-0.0292285	-2964.4	-7.78303e+06	10.4794	0.0106338	26.8911	1.93566e-05	-2964.43	-7.78311e+06
CaC2-iso3	-2966.1	-2966.13	-0.0321771	-2964.4	-7.78304e+06	5.21901	0.0887699	13.8893	0.00366989	-2964.44	-7.78312e+06
CaC2-iso4	-2966.09	-2966.12	-0.0298872	-2964.4	-7.78303e+06	19.0679	0.000332698	33.7502	1.21667e-06	-2964.43	-7.7831e+06
CaC2-iso5	-2966.09	-2966.13	-0.0294497	-2964.4	-7.78304e+06	3.59029	0.17124	19.4214	0.000393975	-2964.43	-7.78312e+06
CaC2-sym	-2966.1	-2966.13	-0.0285224	-2964.41	-7.78304e+06	0	0.72878	18.2656	0.000627983	-2964.43	-7.78312e+06
OH-iso1	-3042.58	-3042.61	-0.0272752	-3040.83	-7.9837e+06	0	0.992101	1.71273	0.321706	-3040.86	-7.98377e+06
OH-iso2	-3042.57	-3042.61	-0.0436914	-3040.81	-7.98364e+06	64.6178	4.74251e-12	23.2298	5.46794e-05	-3040.85	-7.98375e+06
OH-iso3	-3042.58	-3042.61	-0.0325009	-3040.83	-7.98369e+06	12.0073	0.0078156	0	0.641973	-3040.86	-7.98378e+06
OH-iso4	-3042.57	-3042.61	-0.0340854	-3040.82	-7.98368e+06	23.2912	8.24352e-05	7.12384	0.0362639	-3040.86	-7.98377e+06
OH-iso5	-3042.57	-3042.6	-0.0303704	-3040.82	-7.98366e+06	37.4578	2.71788e-07	31.0441	2.33792e-06	-3040.85	-7.98374e+06
OH-sym	-3042.58	-3042.6	-0.0243143	-3040.82	-7.98367e+06	36.4799	4.03236e-07	45.9664	5.68265e-09	-3040.84	-7.98373e+06
CaC2 polymorphs	G(CaC2), crystalline, 300K, PBE0/pob-TZVP, kJ/mol	Relative G	Boltzmann weight	G(CaC2), Hartree						CaC2 ensemble average, kcal/mol:	0.0168871
CaC2-I (139)	-1.97852e+06	0	0.890795	-753.577						HO-Ca-CCH ensemble average, kcal/mol:
CaC2-II (15)	-1.97851e+06	5.20304	0.109205	-753.575
CaC2-III (12)	-1.9785e+06	13.1692	0	-753.572
	∆Gsub (300K, PBE0/pob-TZVP), kcal/mol	∆Gsub, Hartree		0.00301879	is ∆G = RTln(24.465)	1 mol ideal gas to 1mol/l
CaC2(s) ⟶ CaC2 (g)	185.642	0.295839		0.00249329
	REACTIONS	∆Grxn, Hartree	∆Grxn, kcal/mol
	CaC2 (g) ⟶ HCC-Ca-OH (g)	-0.166533	-104.501
	CaC2 (g) ⟶ (DMSO)4CaC2 (g)	-0.219989	-138.045
	(DMSO)4CaC2 (g) ⟶ (DMSO)4CaC2 (sol.)	-0.0359098	-22.5338
	HCC-Ca-OH (g) ⟶ (DMSO)4HCC-Ca-OH (g)	-0.116185	-72.9074
	(DMSO)4HCC-Ca-OH (g) ⟶ (DMSO)4HCC-Ca-OH (sol.)	-0.0276553	-17.354
	CaC2 (s) ⟶ (DMSO)4CaC2 (sol.)	0.0399408	25.0632
∆Gprot (300K)	CaC2 (s) ⟶ (DMSO)4HCC-Ca-OH (sol.)	-0.0145343	-9.1204

## Sheet: Ca2+ and HCC-Ca-OH
	Water				DMSO
M06-2X/6-31+G**	E (tot.) in vacuum	E (tot.) in water (SMD)		M06-2X/6-31+G**	E (tot.) in vacuum	E (tot.) in DMSO (SMD)
Ca2+	-676.853	-677.305		Ca2+	-676.853	-677.298
				HCC-Ca-OH	-830.09	-830.12
PBE0/ma-def2-TZVP	E (tot.) in vacuum	E (tot.) in water (C-PCM)		PBE0/ma-def2-TZVP	E (tot.) in vacuum	E (tot.) in DMSO (C-PCM)
Ca2+	-676.719	-677.189		Ca2+	-676.719	-677.185
				HCC-Ca-OH	-829.922	-829.962
BP86/TZVP	E (tot.) in vacuum	E (tot.) in water (COSMO)		BP86/TZVP	E (tot.) in vacuum	E (tot.) in DMSO (COSMO)
Ca2+	-676.956	-677.424		Ca2+	-676.956	-677.418
				HCC-Ca-OH	-830.291	-830.34
in DMSO	J/mol	kcal/mol
∆Gsolv (Born*)	-2.71897e+06	-649.85		*According to the Born equation
				Ionic radii: 10.1107/S0567739476001551		0.00301879	is ∆G = RTln(24.465)	1 mol ideal gas to 1mol/l
in water	J/mol	kcal/mol
∆Gsolv (Born*)	-2.58795e+06	-618.534	CN=7**	**see 10.1021/acs.jpcb.5b09579
∆Gsolv (Born*)	-2.74322e+06	-655.646	CN=6
			#VALUE!
	M06-2X/6-31+G**	M06-2X/6-31+G**		PBE0-D3(BJ)/def2-TZVP-gCP
Cluster-continuum	E (tot.) in vacuum	E (tot.) in water (SMD)	∆Gsolv	G (tot) in vacuum
Ca2+				-676.735
Ca2+(H2O)7	-1212.06	-1212.36	-0.292896	-1211.67
H2O				-76.3721
∆Gsol in water:	Model	Ca2+, kcal/mol	Deviation 1, kcal/mol	Deviation 2, kcal/mol	Deviation 3, kcal/mol			∆Gsol in DMSO:	Model	Ca2+	HCC-Ca-OH
	SMD	-283.791	75.9129	97.0093	102.443				SMD	-279.325	-19.0927
	C-PCM	-294.993	64.711	85.8074	91.2407				C-PCM	-292.379	-25.158
	COSMO	-293.713	65.9911	87.0874	92.5207				COSMO	-289.851	-30.4582
	Cluster-contiunnm	-387.55	-27.8464	-6.75002	-1.31675				Born	-649.85
	Born	-618.534	-258.83	-237.734	-232.301
Exp. 1 (kJ/mol)	-1505	-359.704	DOI: 10.1039/FT9918702995
Exp. 2 (kJ/mol)	-1593.27	-380.8	DOI: 10.1007/978-1-4684-2955-8_1
Exp. 3 (kJ/mol)	-1616	-386.233	DOI: 10.1143/JPSJ.61.4247 (and references therein)
	[kJ/mol]	[kcal/mol]

## Sheet: Solvent to acetylide H-transfer
	M06-2X/6-31+G**	M06-2X/6-31+G**		B97-3c
Protonation of C2−	E (tot.) in vacuum	E (tot.) in DMSO (SMD)	∆Gsolv in DMSO	G (tot) in vacuum	G (tot) in DMSO	Figure N.
R-intra	-2966.1	-2966.15	-0.045475	-2965.84	-2965.89	1
TS1-intra	-2966.09	-2966.14	-0.0437678	-2965.84	-2965.88	2
TS2-intra	-2966.09	-2966.13	-0.0395761	-2965.83	-2965.87	3
TS3-intra	-2966.09	-2966.13	-0.0399078	-2965.84	-2965.87	4
P1-intra	-2966.14	-2966.17	-0.0281889	-2965.88	-2965.91	5
P2-intra	-2966.15	-2966.18	-0.0298535	-2965.88	-2965.91	6
P3-intra	-2966.14	-2966.17	-0.0289818	-2965.88	-2965.91	7
R-inter	-3519.21	-3519.25	-0.0467814	-3518.87	-3518.92	8
TS1-inter	-3519.17	-3519.23	-0.0512862	-3518.85	-3518.9	9
TS2-inter	-3519.18	-3519.23	-0.0502324	-3518.85	-3518.9	10
P1-inter	-3519.22	-3519.26	-0.0359473	-3518.88	-3518.92	11
P2-inter	-3519.21	-3519.25	-0.0393448	-3518.88	-3518.92	12
Protonation of −CCH
R-Intra-CCH	-3042.58	-3042.62	-0.0352538	-3042.3	-3042.34	13
TS1-intra-CCH	-3042.55	-3042.58	-0.0280148	-3042.27	-3042.3	14
TS2-intra-CCH	-3042.55	-3042.57	-0.0267834	-3042.27	-3042.3	15
P1-intra-CCH	-3042.56	-3042.58	-0.0261959	-3042.28	-3042.31	16
P2-intra-CCH	-3042.55	-3042.58	-0.0253341	-3042.28	-3042.3	17
	Reaction	∆Grxn, kca/mol	∆Grxn, Hartree	Imaginary mode, cm-1
	R-intra ⟶ TS1-intra	3.34663	0.0053332
	R-intra ⟶ TS2-intra	9.69233	0.0154457
	R-intra ⟶ TS3-intra	8.3765	0.0133488
	R-intra ⟶ P1-intra	-12.8288	-0.020444
	R-intra ⟶ P2-intra	-14.3406	-0.0228532
	R-intra ⟶ P3-intra	-11.6375	-0.0185455
	R-inter ⟶ TS1-inter	11.4155	0.0181918
	R-inter ⟶ TS2-inter	11.3397	0.0180709
	R-inter ⟶ P1-inter	0.581373	0.000926477
	R-inter ⟶ P2-inter	0.914868	0.00145793
	R-intra-CCH ⟶ TS1-intra-CCH	20.6526	0.032912	-1068.77
	R-intra-CCH ⟶ TS2-intra-CCH	21.4863	0.0342406	-855.44
	R-intra-CCH ⟶ P1-intra-CCH	17.7045	0.0282138
	R-intra-CCH ⟶ P2-intra-CCH	20.2715	0.0323047

## Sheet: Acidity in DMSO
PBE0/ma-def2-TZVP OPT NUMFREQ	Species	E_vacuo (PBE0/ma-def2-TZVP)	E_vacuo (M06-2X/6-31+G**)	E_SMD (M06-2X/6-31+G**)	G_vacuo (PBE0/ma-def2-TZVP)	Relative G	Boltzmann weight	G_full	point group	Symmetry number
	-CC-	-75.8303	-75.8705	-76.2649	-75.8446			-76.236	Dinfh	2
	DMSO	-552.971	-553.078	-553.092	-552.92			-552.928	C1	1
	DMSO- 1	-552.358	-552.467	-552.558	-552.321	0.195244	0.48032	-552.409	C1	1
	DMSO- 2	-552.358	-552.467	-552.558	-552.321	0	0.51968	-552.409	C1	1
	DMSO+ 1	-553.279	-553.366	-553.476	-553.216	68.4766	1.00789e-12	-553.323	C1	1
	DMSO+ 2	-553.319	-553.432	-553.529	-553.256	0	1	-553.349	C1	1
	HCC-	-76.6434	-76.687	-76.7966	-76.648			-76.7547	Cinfv	1
	HCCH	-77.2563	-77.2956	-77.2978	-77.2482			-77.2473	Dinfh	2
	PhCC-	-307.524	-307.672	-307.775	-307.457			-307.557	C2v	2
	PhCCH	-308.126	-308.269	-308.277	-308.045			-308.05	C2v	2
	HOH	-76.379	-76.3945	-76.4032	-76.3752			-76.3808	C2v	2
	-OH	-75.7444	-75.7582	-75.8741	-75.752			-75.8649	Cinfv	1
PBE0/ma-def2-TZVP		∆Grxn in DMSO	pKa in DMSO	Deviation		Relative ∆G	Relative pKa		EXP* rel pKa	Deviation
Based on Fawcett's data	HCCH ⟶ HCC- + H+	34.2133	25.0785	-4.62151	HCCH + DMSO- ⟶ HCC- + DMSO	-16.314	-11.9582	pKa(HCCH) - pKa(DMSO)	-5.4	-6.55822
	PhCCH ⟶ PhCC- + H+	34.6177	25.375	-3.32505
	HOH ⟶ HO- + H+	48.8158	35.7822	4.38221	HCC- + DMSO- ⟶ C2- + DMSO	0.0325771	0.0238792	pKa(HCC-) - pKa(DMSO)
	DMSO ⟶ DMSO(dep)- + H+	50.5272	37.0367	1.93671
			RMSD:	3.72051	HOH + HCC- ⟶ OH- + HCCH	14.6025	10.7037	pKa(HOH) - pKa(HCCH)	1.7	9.00372
Based on the data	HCCH ⟶ HCC- + H+	29.5557	21.6645	-8.03552
by Truhlar et al.	PhCCH ⟶ PhCC- + H+	29.9602	21.9609	-6.73906	HOH + C2- ⟶ OH- + HCC-	-1.74403	-1.27838	pKa(HOH) - pKa(HCC-)
	HOH ⟶ HO- + H+	44.1582	32.3682	0.968201
	DMSO ⟶ DMSO(dep)- + H+	45.8697	33.6227	-1.4773	PhCCH + DMSO- ⟶ PhCC- + DMSO	-15.9095	-11.6618	pKa(PhCCH) - pKa(DMSO)	-6.4	-5.26176
			RMSD:	5.31752
					PhCCH + HO- ⟶ PhCC- + HOH	-14.1981	-10.4073	pKa(PhCCH) - pKa(HOH)	-2.7	-7.70726
		∆G of HCC- ⟶ -CC- + H+	pKa of HCC- in DMSO:
		50.5598	37.0606		DMSO + HO- ⟶ DMSO- + HOH	1.71145	1.2545	pKa(DMSO) - pKa(HOH)	3.7	-2.4455
									RMSD:	6.59008
G_gas(H+)+∆G_solv(H+) in DMSO	-274.882	kcal/mol							*for HCCH, calculated reference value is used
	-0.43812	Hartree
								Direct modeling of the autoptotolysis of DMSO
								∆G of autoprotolysis
G_gas(H+)+∆G_solv(H+) in DMSO	-279.582	kcal/mol	NOTE					60.9002
	-0.445543	Hartree	0.00301879	is ∆G = RTln(24.465)	1 mol ideal gas to 1mol/l			pH (DMSO)
			0.00249329	is ∆G = RTln(14.023)	concentration of DMSO in pure DMSO			44.6402
pKa (EXP) in DMSO
PhCCH	28.7	10.1021/ja00283a028		Gibbs energy of the proton gas
HOH	31.4	10.1021/jo01304a032		0.0100113	10.1021/jp508968z
DMSO	35.1	10.1021/jo01304a032		-6.28219	kcal/mol
pKa (HCCH) in DMSO	29.7				∆G_solv(H+)
DOI:	10.1134/S0012500814070040	Calculated, MP2/6-311++G**//B3LYP/6-31+G* (PCM)			10.1021/la7038976	-268.6	kcal/mol
					10.1021/jp065403l	-273.3	kcal/mol

## Sheet: SMD at different levels
			Basis set: 6-31+G**
Molecule	M05-2X, vac	M05-2X, SMD	M06-2X, vac	M06-2X, SMD	PBE0, vac	PBE0, SMD
CaC2*4DMSO	-2966.37	-2966.42	-2966.11	-2966.16	-2964.99	-2965.03
DMSO	-553.144	-553.16	-553.081	-553.097	-552.869	-552.884
H2O	-76.4163	-76.4253	-76.395	-76.4038	-76.3491	-76.3579
HOCaCCH*4DMSO	-3042.87	-3042.91	-3042.59	-3042.63	-3041.42	-3041.45
	SMD ∆Gsolv
	M05-2X	M06-2X	PBE0
CaC2*4DMSO	-32.0719	-31.2323	-29.8266
DMSO	-10.1313	-9.73852	-9.41477
H2O	-5.63103	-5.5465	-5.49198
HOCaCCH*4DMSO	-25.7899	-24.795	-23.4132
	RMSD:	0.681211	1.67501
